# Supplementary material for: Robot-Assisted Magnetic Resonance Imaging-Targeted versus Systematic Prostate Biopsy; Systematic Review and Meta-Analysis
Source: MDPI journal article supplement (doi:10.3390/cancers15041181), 2023-02-13
Supplement: s1 [file s1]

Supplementary Figures

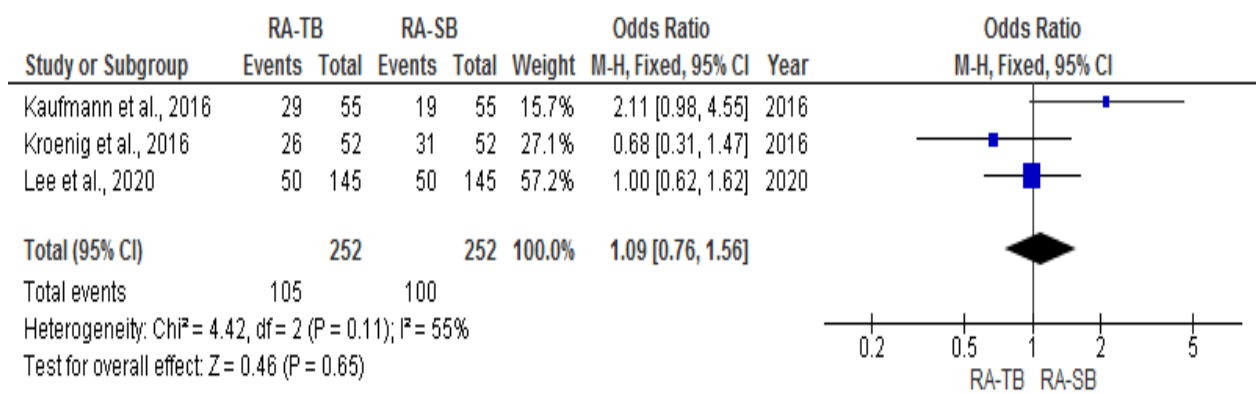

Figure S1. Cancer detection rate per prior negative patient

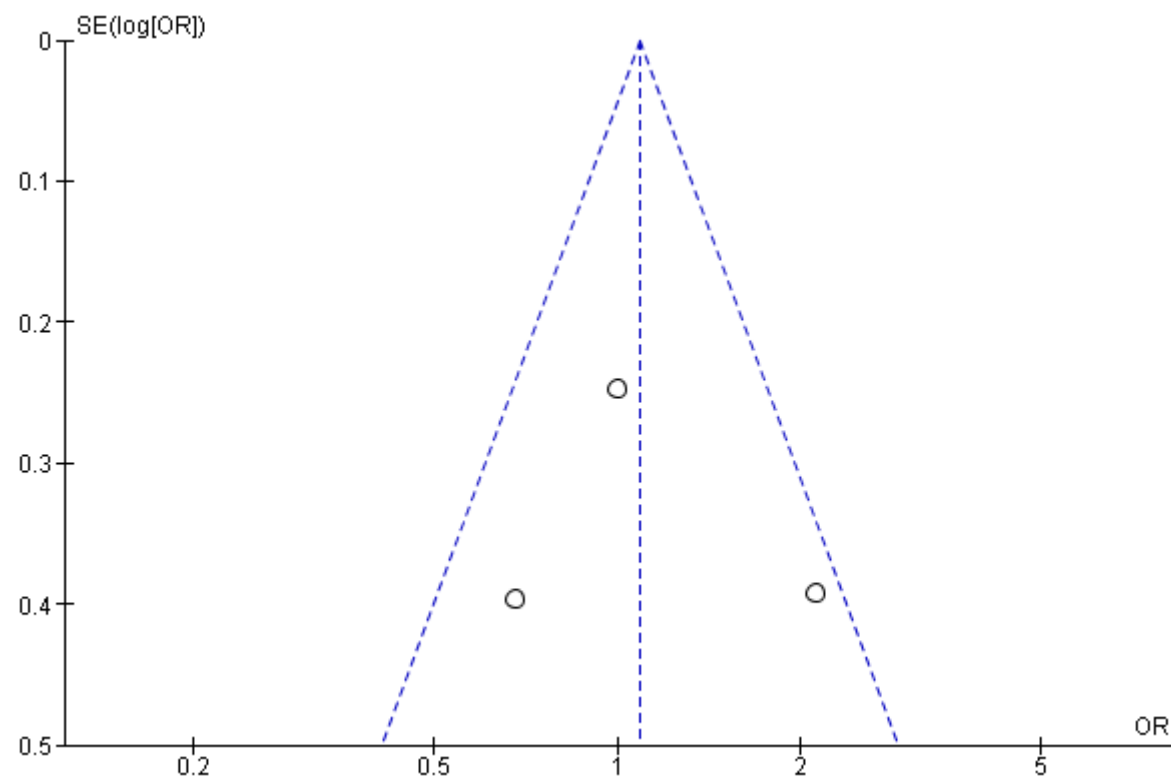

Figure S2. Funnel plot for cancer detection rate per prior negative patient

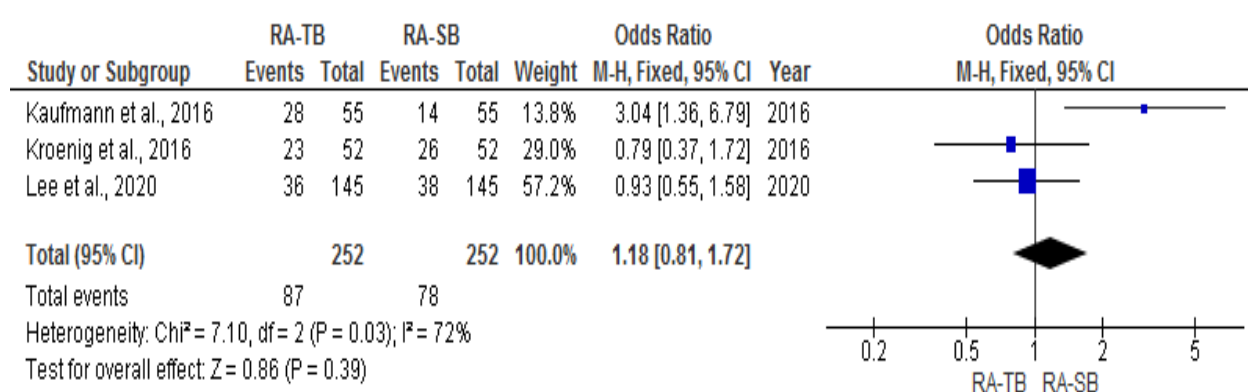

**Figure S3. Clinically significant cancer detection rate per prior negative patient**

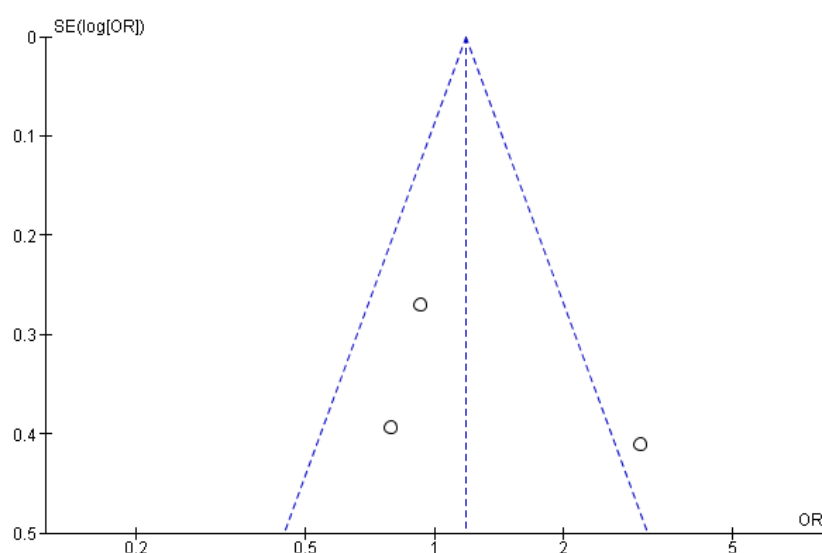

**Figure S4. Funnel plot for clinically significant cancer detection rate per prior negative patient**

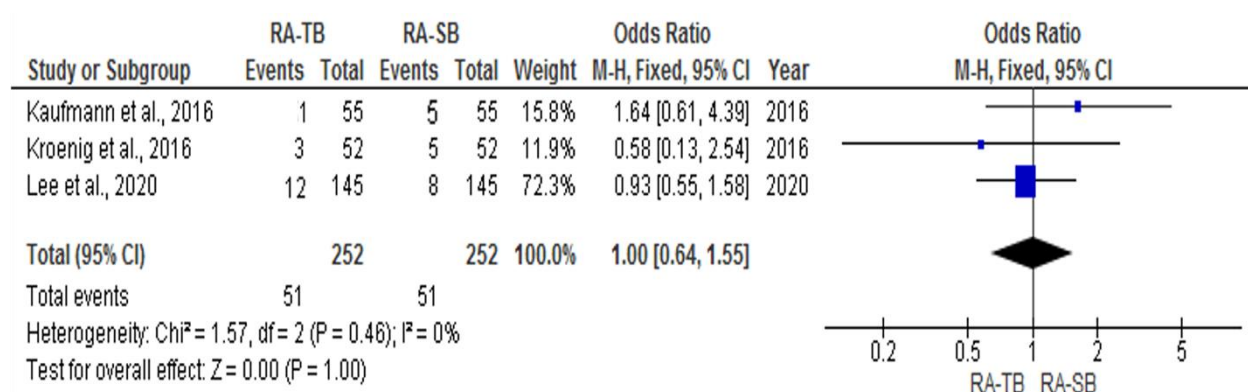

**Figure S5. Clinically insignificant cancer detection rate per prior negative patient**

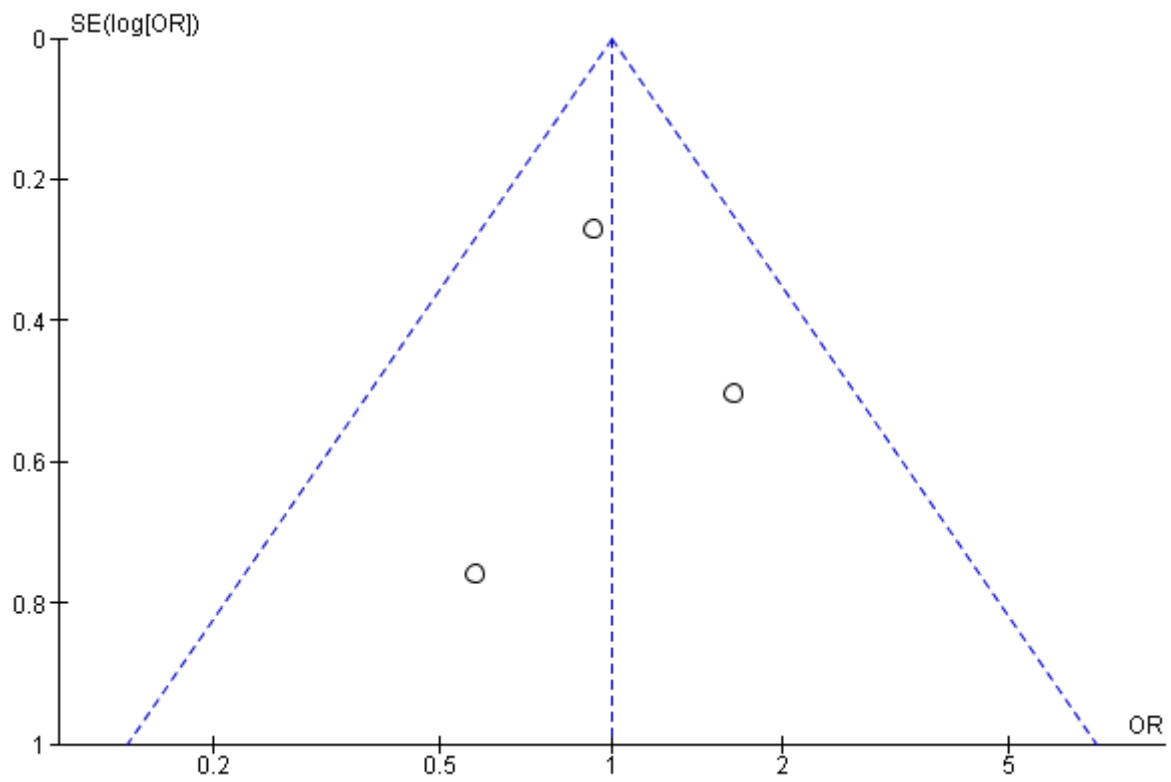

**Figure S6. Funnel plot for clinically insignificant cancer detection rate per prior negative patient**
